# Supplementary material
Source: Research Square preprint supplement (doi:10.21203/rs.3.rs-9282596/v1)
Supplement: Supplementary file 1 [file e7ab34ea0e042058ab63f1f1.docx]

**Supplementary Material**

**Deep Neural Networks for the Early Prediction of Abnormal Blood Flow: A Systematic Review of Techniques, Clinical Validation, and Future Directions**

Table S1 Characteristics of included studies

| Ref | Year | Study Design | Population | DNN Architecture | Input Modality | Prediction Task |
| --- | --- | --- | --- | --- | --- | --- |
| (Elsayed et al., 2021; Khan et al., 2024; Zhou et al., 2023; Braaf et al., 2019; Komoriyama et al., 2021; Guan et al., 2021; Koirala & McLennan, 2021; Ahmed et al., 2025; Spampinato et al., 2021; Cheng et al., 2024) | 2019-2025 | Clinical (8), Simulation (2) | Human (9), Synthetic (1) | CNN (3), physics-informed (1), NS (6) | Cardio (7), Hemodynamic (1), NS (2) | Classification (10) |
| (Koirala & McLennan, 2021; Taebi, 2022; Hong et al., 2020; Kim et al., 2022; Arar et al., 2021; Kato et al., 2021; Yevtushenko et al., 2023; Malek et al., 2025; Srinivas et al., 2023; Rao et al., 2024) | 2017-2025 | Clinical (9), Simulation (1) | Human (8), Synthetic (2) | CNN (5), transformer (2), NS (3) | Cardio (8), Cerebro (1), Vascular (1) | Classification (9), Regression (1) |
| (Elsheikhy et al., 2025; Fang et al., 2025; Hu et al., 2023; Isaak et al., 2021; Jayanthy et al., 2011; Sanches et al., 2024; Spartera et al., 2021; Wu & Guo, 2025; Yokoyama et al., 2022; Chang et al., 2025) | 2004-2025 | Clinical (8), Simulation (1), NS (1) | Human (10) | transformer (1), rnn (2), NS (7) | Cardio (9), NS (1) | Classification (9), None (1) |
| (Arefinia et al., 2023; Liu et al., 2025; Khalil & Abu-Naser, 2022; Bissell et al., 2023; Samant & Pacharaney, 2025; Buaka & Moid, 2024; Thangaraju & Sharma, 2023; Mahmood, 2024; Arefinia et al., 2024; Ezz, 2025) | 2004-2025 | Clinical (7), Simulation (1), NS (2) | Human (9), Synthetic (1) | CNN (5), physics-informed (2), rnn (1), NS (2) | Cardio (7), NS (3) | Classification (8), None (2) |
| (Hussain & Mohammed, 2025; Mahmood, 2024; Nisha et al., 2023a; Nisha et al., 2023b; Ezz, 2025; Holtackers et al., 2021; Sun et al., 2023; Maul et al., 2024; Balasubramanian et al., 2023; Csala et al., 2024) | 2021-2025 | Clinical (8), Simulation (2) | Human (8), Synthetic (2) | CNN (4), physics-informed (3), pinn (1), NS (2) | Cardio (6), Cerebro (1), NS (3) | Classification (9), Regression (1) |
| (Velikorodny et al., 2025; Spartera et al., 2021; Chang et al., 2025; Mansoor & Garcia, 2023; Botta et al., 2025; Alsayat et al., 2025; Le et al., 2021; Padhee et al., 2022; Ye et al., 2024; Helmy et al., 2022) | 2021-2025 | Clinical (9), Simulation (1) | Human (10) | CNN (4), physics-informed (3), NS (3) | Cardio (7), Hemodynamic (2), NS (1) | Classification (10) |
| (Hiramori et al., 2022; Gorgis et al., 2022; Arefinia et al., 2024; Srinivas et al., 2023; Rao et al., 2024; Choudhary et al., 2024; Du et al., 2025a; Du et al., 2025b; Stankovic et al., 2014; Garay et al., 2023) | 2013-2025 | Clinical (8), Simulation (1), NS (1) | Human (8), Synthetic (2) | CNN (3), physics-informed (1), NS (6) | Cardio (6), NS (4) | Classification (7), None (3) |
| (Centofanti et al., 2025; Trenti et al., 2025; Arzani et al., 2021; Sierpe et al., 2025; Chen et al., 2025; Acevedo Lipes, 2020; Syed et al., 2023; Schrauben et al., 2019; Sen et al., 2025; Mansoor & Garcia, 2023) | 2003-2025 | Clinical (8), Simulation (1), NS (1) | Human (9), Synthetic (1) | transformer (2), physics-informed (3), NS (5) | Cardio (7), Hemodynamic (2), Cerebro (1) | Classification (9), None (1) |
| (Li et al., 2024; Soloukey et al., 2024; Cheng et al., 2023; Ku, 2003; Garnier et al., 2025; Nawaz & Dine, 2024; Nannini et al., 2025; Rygiel et al., 2025; Ahn, 2025; de Turenne et al., 2025) | 2020-2025 | Clinical (6), Simulation (3), NS (1) | Human (8), Synthetic (2) | transformer (3), CNN (1), physics-informed (1), NS (5) | Cardio (5), Hemodynamic (3), Cerebro (1), NS (1) | Classification (9), None (1) |
| (Isaak et al., 2021; Young, 1980; Elsayed et al., 2021; Khan et al., 2024; Zhou et al., 2023; Braaf et al., 2019; Komoriyama et al., 2021; Guan et al., 2021; Koirala & McLennan, 2021; Ahmed et al., 2025) | 2009-2025 | Clinical (7), Simulation (2), NS (1) | Human (7), Synthetic (3) | CNN (3), physics-informed (1), NS (6) | Cardio (5), Hemodynamic (3), Vascular (1), NS (1) | Classification (8), Regression (1), None (1) |
| (Elsayed et al., 2021; Khan et al., 2024; Zhou et al., 2023; Braaf et al., 2019; Komoriyama et al., 2021; Guan et al., 2021; Koirala & McLennan, 2021; Ahmed et al., 2025; Spampinato et al., 2021; Cheng et al., 2024) | 2000-2025 | Clinical (6), Simulation (2), NS (2) | Human (8), Synthetic (2) | CNN (1), pinn (1), NS (8) | Cardio (4), Hemodynamic (4), NS (2) | Classification (5), Regression (2), None (3) |
| (Elsayed et al., 2021; Khan et al., 2024; Zhou et al., 2023; Braaf et al., 2019; Komoriyama et al., 2021; Guan et al., 2021; Koirala & McLennan, 2021; Ahmed et al., 2025; Spampinato et al., 2021; Cheng et al., 2024) | 2012-2022 | Clinical (9), Simulation (1) | Human (9), Synthetic (1) | CNN (1), NS (9) | Cardio (9), NS (1) | Classification (9), None (1) |
| (Elsayed et al., 2021; Khan et al., 2024; Zhou et al., 2023; Braaf et al., 2019; Komoriyama et al., 2021; Guan et al., 2021; Koirala & McLennan, 2021; Ahmed et al., 2025; Spampinato et al., 2021; Cheng et al., 2024) | 2019-2025 | Clinical (8), Simulation (1), NS (1) | Human (8), Synthetic (2) | CNN (1), NS (9) | Cardio (8), Hemodynamic (1), NS (1) | Classification (9), None (1) |
| (Elsayed et al., 2021; Khan et al., 2024; Zhou et al., 2023; Braaf et al., 2019; Komoriyama et al., 2021; Guan et al., 2021; Koirala & McLennan, 2021; Ahmed et al., 2025; Spampinato et al., 2021; Cheng et al., 2024) | 2021-2025 | Clinical (6), Simulation (3), NS (1) | Human (8), Synthetic (2) | NS (10) | Cardio (4), Cerebro (2), Hemodynamic (2), NS (2) | Classification (7), None (3) |
| (Elsayed et al., 2021; Khan et al., 2024; Zhou et al., 2023; Braaf et al., 2019; Komoriyama et al., 2021; Guan et al., 2021; Koirala & McLennan, 2021; Ahmed et al., 2025; Spampinato et al., 2021; Cheng et al., 2024) | 2009-2024 | Clinical (7), Simulation (1), NS (2) | Human (8), Synthetic (2) | CNN (2), NS (8) | Cardio (7), Cerebro (1), NS (2) | Classification (8), None (2) |
| (Elsayed et al., 2021; Khan et al., 2024; Zhou et al., 2023; Braaf et al., 2019; Komoriyama et al., 2021; Guan et al., 2021; Koirala & McLennan, 2021; Ahmed et al., 2025; Spampinato et al., 2021; Cheng et al., 2024) | 2009-2025 | Clinical (5), Simulation (3), NS (2) | Human (7), Synthetic (2), Animal (1) | CNN (2), NS (8) | Cardio (5), Cerebro (2), Vascular (1), NS (2) | Classification (8), None (2) |
| (Elsayed et al., 2021; Khan et al., 2024; Zhou et al., 2023; Braaf et al., 2019; Komoriyama et al., 2021; Guan et al., 2021; Koirala & McLennan, 2021; Ahmed et al., 2025; Spampinato et al., 2021; Cheng et al., 2024) | 2016-2025 | Clinical (7), Simulation (2), NS (1) | Human (7), Synthetic (3) | CNN (3), physics-informed (1), NS (6) | Cardio (5), Vascular (2), NS (3) | Classification (9), Regression (1) |
| (Elsayed et al., 2021; Khan et al., 2024; Zhou et al., 2023; Braaf et al., 2019; Komoriyama et al., 2021; Guan et al., 2021; Koirala & McLennan, 2021; Ahmed et al., 2025; Spampinato et al., 2021; Cheng et al., 2024) | 2012-2024 | Clinical (9), Simulation (1) | Human (9), Synthetic (1) | lstm (1), NS (8) | Cardio (8), Hemodynamic (1), NS (1) | Classification (8), None (2) |
| (Elsayed et al., 2021; Khan et al., 2024; Zhou et al., 2023; Braaf et al., 2019; Komoriyama et al., 2021; Guan et al., 2021; Koirala & McLennan, 2021; Ahmed et al., 2025; Spampinato et al., 2021; Cheng et al., 2024; Young, 1980) | 2012-2025 | Clinical (8), Simulation (2), NS (2) | Human (9), Animal (1), Synthetic (2) | CNN (2), physics-informed (1), NS (9) | Cardio (8), Hemodynamic (1), NS (3) | Classification (9), Regression (1), None (2) |

Table S2 At-a-Glance Summary: Key Insights from All Figures

| Figure | Title | Key Findings | Critical Gaps |
| --- | --- | --- | --- |
| 2 | PRISMA Flow Diagram | 789 initial records → 192 final studies (24.4% inclusion rate) | 597 studies excluded (76% attrition) |
| 5 | Risk of Bias Assessment | Metric reporting (84%), comparison (83%), study design (78%) are strong | Statistical analysis (20% low risk), validation (50% low risk) |
| 6 | Medical Domain Distribution | Cardiology dominates with 144 studies (75%) | Cerebrovascular (4.2%) and Vascular (4.2%) severely underexplored |
| 7 | Architecture Distribution | CNN leads with 67 studies (34.9%), PINN at 12.5% | **44.3% unspecified architecture** (85 studies), RNN/LSTM only 2.1% |
| 8 | Quality Metrics | Comparison (83%), prediction mentioned (65%) | Validation only 50%, all three metrics only 27% |
| 9 | Data Source Distribution | Human data dominates: 148 studies (77%) | Animal studies: **only 1 study (0.5%)** - critical preclinical gap |
| 10 | Architecture by Domain | CNN highest in Vascular (50%), PINN only in Cardiology/Hemodynamics | PINN absent in Cerebrovascular/Vascular; Transformers absent in Cerebrovascular |
| 11 | Publication Trends | 69.8% of studies (134) published since 2020 | Pre-2020: only 42 studies (22%) in 20 years |
| 12 | Metric Reporting | Accuracy 62%, Sensitivity 50% | Specificity 34%, AUC 20%, Error metrics 18% - all critically low |
| 13 | Study Design Over Time | Clinical studies 80-100% across all periods | Simulation studies steady at 14-22% (complementary only) |
| **14** | Quality Score Distribution | High quality (8-10): 111 studies (57.8%) | Low quality (0-4): 25 studies (13%); Avg score: 7.3/10 |

##

Table S3 Performance Metrics Summary

| Metric | Studies Reporting | Percentage |
| --- | --- | --- |
| Accuracy | 119 | 61.7% |
| Sensitivity | 96 | 50.0% |
| Specificity | 65 | 34.0% |
| AUC | 38 | 19.8% |
| RMSE/MAE | 35 | 18.2% |
| Multiple Metrics (≥2) | 95 | 49.5% |
| Single Metric Only | 67 | 34.9% |
| No Metrics Reported | 30 | 15.6% |
| Metric Combination | Count | Percentage |
| Accuracy Only | 25 | 13.0% |
| Accuracy + Sensitivity | 32 | 16.7% |
| Accuracy + Sensitivity + Specificity | 28 | 14.6% |
| AUC + Accuracy | 15 | 7.8% |
| Error Metrics Only (RMSE/MAE) | 15 | 7.8% |
| Other Combinations | 47 | 24.5% |

Table S4 Comparison of DNN Architectures

| Architecture | Count | Percentage | Strengths | Limitations | Typical Applications |
| --- | --- | --- | --- | --- | --- |
| CNN | 67 | 34.9% | High accuracy, mature technology, excellent for image data | Limited temporal modeling, black-box nature | MRI, CT, Ultrasound image analysis |
| Physics-informed (PINN) | 24 | 12.5% | Mechanistic consistency, improved generalizability, interpretability | Complex implementation, computational cost | Flow prediction, pressure estimation, CFD integration |
| Transformer | 12 | 6.3% | Long-range dependency capture, attention mechanisms | Extreme data requirements, emerging technology | 4D-flow MRI, temporal sequence analysis |
| RNN/LSTM | 4 | 2.1% | Temporal dynamics modeling, sequence prediction | Training instability, vanishing gradients | Doppler signals, time-series flow data |
| Unspecified | 85 | 44.3% | - | Major reporting deficiency | - |

Table S5 Top Performing Studies by Metric

| Metric | Top Performers | Performance Range |
| --- | --- | --- |
| AUC | (Ahmed et al., 2025; Hu et al., 2023; Liu et al., 2025; Velikorodny et al., 2025; Arefinia et al., 2024) | 0.92-0.98 |
| Accuracy | (Khan et al., 2024; Ahmed et al., 2025; Malek et al., 2025; Liu et al., 2025; Nisha et al., 2023a; Ezz, 2025; Velikorodny et al., 2025) | 90-97% |
| Sensitivity | (Khan et al., 2024; Ahmed et al., 2025; Malek et al., 2025; Liu et al., 2025; Mahmood, 2024; Nisha et al., 2023a; Velikorodny et al., 2025; Chang et al., 2025) | 88-96% |
| Specificity | (Khan et al., 2024; Hu et al., 2023; Liu et al., 2025; Elsheikhy et al., 2025; Ezz, 2025; Velikorodny et al., 2025) | 85-95% |
| Multiple Metrics | (Ahmed et al., 2025; Malek et al., 2025; Hu et al., 2023; Liu et al., 2025; Nisha et al., 2023a; Velikorodny et al., 2025) | All metrics ≥90% |

Table S6 Temporal Trends Summary

| Period | Total Studies | Clinical % | Simulation % | CNN % | PINN % | Transformer % | Unspecified % |
| --- | --- | --- | --- | --- | --- | --- | --- |
| 2000-2009 | 7 | 100% | 0% | 0% | 0% | 0% | 100% |
| 2010-2014 | 15 | 83% | 17% | 17% | 0% | 0% | 83% |
| 2015-2019 | 20 | 78% | 22% | 33% | 11% | 0% | 56% |
| 2020-2022 | 62 | 81% | 14% | 39% | 15% | 6% | 40% |
| 2023-2025 | 72 | 81% | 14% | 37% | 17% | 7% | 39% |

Table *S7* Key Uncovered Factors Summary

| Factor | Category | Count | Percentage |
| --- | --- | --- | --- |
| **Optimizer Used** | Adam | 28 | 14.6% |
| SGD | 12 | 6.3% |
| RMSprop | 8 | 4.2% |
| Not Specified | 144 | 75.0% |
| **Hardware GPU** | NVIDIA RTX Series | 22 | 11.5% |
| Tesla V100/A100 | 10 | 5.2% |
| Not Specified | 160 | 83.3% |
| **Code Availability** | GitHub/Public | 35 | 18.2% |
| Not Available | 157 | 81.8% |
| **Normalization Method** | z-score | 42 | 21.9% |
| Min-max | 28 | 14.6% |
| Not Specified | 122 | 63.5% |

Table S8 Methodological Quality by Study Design

| Study Design | Count | Has Validation | Has Comparison | Mentions Prediction | Multiple Metrics | High Quality (8-10) |
| --- | --- | --- | --- | --- | --- | --- |
| **Clinical** | 149 | 82 (55.0%) | 128 (85.9%) | 102 (68.5%) | 82 (55.0%) | 92 (61.7%) |
| **Simulation** | 22 | 10 (45.5%) | 18 (81.8%) | 14 (63.6%) | 8 (36.4%) | 12 (54.5%) |
| **Retrospective** | 2 | 0 (0%) | 2 (100%) | 1 (50.0%) | 1 (50.0%) | 1 (50.0%) |
| **Missing/Other** | 19 | 4 (21.1%) | 12 (63.2%) | 7 (36.8%) | 4 (21.1%) | 6 (31.6%) |
| **TOTAL** | **192** | **96 (50.0%)** | **160 (83.3%)** | **124 (64.6%)** | **95 (49.5%)** | **111 (57.8%)** |

Table S9 Performance Metrics by Architecture

| Architecture | Count | Accuracy | Sensitivity | Specificity | AUC | Error Metrics | Multiple Metrics |
| --- | --- | --- | --- | --- | --- | --- | --- |
| **CNN** | 67 | 52 (77.6%) | 42 (62.7%) | 28 (41.8%) | 18 (26.9%) | 12 (17.9%) | 42 (62.7%) |
| **PINN** | 24 | 18 (75.0%) | 14 (58.3%) | 10 (41.7%) | 6 (25.0%) | 8 (33.3%) | 16 (66.7%) |
| **Transformer** | 12 | 8 (66.7%) | 4 (33.3%) | 2 (16.7%) | 3 (25.0%) | 2 (16.7%) | 6 (50.0%) |
| **RNN/LSTM** | 4 | 3 (75.0%) | 2 (50.0%) | 1 (25.0%) | 1 (25.0%) | 2 (50.0%) | 2 (50.0%) |
| **Unspecified** | 85 | 38 (44.7%) | 34 (40.0%) | 24 (28.2%) | 10 (11.8%) | 11 (12.9%) | 29 (34.1%) |

##

Table S10 Data Source vs. Validation

| Data Source | Count | Internal Validation | External Validation | No Validation | Comparison Only |
| --- | --- | --- | --- | --- | --- |
| **Human Clinical** | 148 | 72 (48.6%) | 28 (18.9%) | 18 (12.2%) | 58 (39.2%) |
| **Synthetic/Simulated** | 40 | 22 (55.0%) | 4 (10.0%) | 12 (30.0%) | 26 (65.0%) |
| **Animal** | 1 | 0 (0%) | 0 (0%) | 1 (100%) | 1 (100%) |
| **Missing** | 3 | 2 (66.7%) | 0 (0%) | 1 (33.3%) | 2 (66.7%) |
| **TOTAL** | **192** | **96 (50.0%)** | **32 (16.7%)** | **32 (16.7%)** | **87 (45.3%)** |

##

Table S11 Characteristics of Included Studies

| Column | Description |
| --- | --- |
| Reference, Year | Citation of the included study |
| Study Design | Retrospective / prospective; dataset characteristics |
| Population | Sample size, patient or lesion count, clinical characteristics |
| DNN Architecture | CNN, RNN, Transformer, hybrid, physics-informed |
| Input Modality | MRI, ultrasound, CT, physiological signal data |
| Prediction Task | Classification, regression, segmentation, risk stratification |
| Validation Method | Internal, external, or hybrid; reference standard |
| Performance Metrics | AUC, accuracy, sensitivity, specificity |
| Key Findings | Primary outcomes and contributions |
| Limitations | Dataset size, generalizability, interpretability |
| Quality Score | PROBAST or QUADAS-2 assessment |
